# Supplementary material
Source: HighWire-hosted journal article supplement (https://erj.ersjournals.com/content/53/3/1801184)
Supplement: inline-supplementary-material-1 [file inline-supplementary-material-1.pdf]

**Table S1 – Results by gender and smear status at time of tuberculosis treatment**

| <b>Result</b>                   | <b>Female<br/>(%)</b> | <b>Male<br/>(%)</b> | <b><i>P</i><br/>value</b> | <b>Smear<br/>positive<br/>(%)</b> | <b>Smear<br/>negative<br/>(%)</b> | <b><i>P</i><br/>value</b> |
|---------------------------------|-----------------------|---------------------|---------------------------|-----------------------------------|-----------------------------------|---------------------------|
| <b>Symptoms</b>                 | n = 101               | n = 184             |                           | n = 225                           | n = 60                            |                           |
| Cough                           | 32<br>(31.7)          | 62<br>(33.7)        | 0.73                      | 75<br>(33.3)                      | 19<br>(31.7)                      | 0.807                     |
| Haemoptysis                     | 7<br>(6.9)            | 14<br>(7.6)         | 0.834                     | 16<br>(7.1)                       | 5<br>(8.3)                        | 0.747                     |
| Fatigue                         | 35<br>(34.7)          | 54<br>(29.3)        | 0.355                     | 68<br>(30.2)                      | 21<br>(35)                        | 0.478                     |
| Fevers                          | 8<br>(7.9)            | 18<br>(9.8)         | 0.602                     | 22<br>(9.8)                       | 4<br>(6.7)                        | 0.616                     |
| Night sweats                    | 15<br>(14.9)          | 36<br>(19.6)        | 0.321                     | 40<br>(17.8)                      | 11<br>(18.3)                      | 0.921                     |
| Chest pain                      | 23<br>(22.8)          | 53<br>(28.8)        | 0.271                     | 60<br>(26.7)                      | 16<br>(26.7)                      | 1                         |
| <b>Chest X-ray results</b>      | n = 101               | n = 184             |                           | n = 225                           | n = 60                            |                           |
| Cavitation                      | 11<br>(10.9)          | 39<br>(21.2)        | <b>0.029</b>              | 43<br>(19.1)                      | 7<br>(11.7)                       | 0.178                     |
| Fungal ball                     | 1<br>(1)              | 12<br>(6.5)         | <b>0.037</b>              | 12<br>(5.3)                       | 1<br>(1.7)                        | 0.313                     |
| Paracavitary fibrosis           | 6<br>(5.9)            | 30<br>(16.3)        | <b>0.012</b>              | 34<br>(15.1)                      | 2<br>(3.3)                        | <b>0.015</b>              |
| Pleural thickening              | 11<br>(10.9)          | 39<br>(21.2)        | <b>0.029</b>              | 43<br>(19.1)                      | 7<br>(11.7)                       | 0.178                     |
| <i>Aspergillus</i> IgG positive | 5<br>(5)              | 23<br>(12.5)        | <b>0.041</b>              | 21<br>(9.3)                       | 7<br>(11.7)                       | 0.590                     |
| <b>CT thorax results</b>        | n = 16                | n = 57              |                           | n = 60                            | n = 13                            |                           |
| Fungal ball                     | 2<br>(12.5)           | 9<br>(15.8)         | 1                         | 9<br>(15)                         | 2<br>(15.4)                       | 1                         |
| Cavitation                      | 7<br>(43.7)           | 28<br>(49.1)        | 0.704                     | 30<br>(50)                        | 5<br>(38.5)                       | 0.45                      |
| Paracavitary fibrosis           | 5<br>(31.2)           | 23<br>(40.4)        | 0.508                     | 24<br>(40)                        | 4<br>(30.8)                       | 0.754                     |
| Pleural thickening              | 9<br>(56.2)           | 39<br>(68.4)        | 0.365                     | 40<br>(66.7)                      | 8<br>(61.5)                       | 0.724                     |
| Nodule(s)                       | 12<br>(75)            | 50<br>(87.7)        | 0.209                     | 52<br>(86.7)                      | 10<br>(76.9)                      | 0.373                     |
| Bronchiectasis                  | 11<br>(68.7)          | 43<br>(75.4)        | 0.590                     | 46<br>(76.7)                      | 8<br>(61.5)                       | 0.26                      |
| Destroyed lung                  | 2<br>(12.5)           | 1<br>(1.8)          | 0.119                     | 2<br>(3.3)                        | 1<br>(7.7)                        | 0.45                      |
| <b>Final diagnosis</b>          | n = 101               | n = 184             |                           | n = 225                           | n = 60                            |                           |
| CPA                             | 3<br>(3)              | 11<br>(6)           | 0.392                     | 10<br>(4.4)                       | 4<br>(6.7)                        | 0.503                     |

**Table S2 –CPA frequency in relation to potential risk factors**

| Factor at time of recruitment         | Number with CPA where factor is present (%) | Number with CPA where factor is absent (%) | <i>p-value</i> |
|---------------------------------------|---------------------------------------------|--------------------------------------------|----------------|
| All patients<br>n=285                 | 14<br>(4.9)                                 | -                                          | -              |
| CD4 count < 100 cells/ $\mu$ L<br>n=3 | 0                                           | 14<br>(5)                                  | 1              |
| Subsistence farmer<br>n=270           | 14<br>(5.2)                                 | 0                                          | 1              |
| Traditional dwelling<br>n=270         | 14<br>(5.2)                                 | 0                                          | 1              |
| Dampness reported in house<br>n=78    | 3<br>(3.8)                                  | 11<br>(5.3)                                | 0.765          |
| Frequently cooks on charcoal<br>n=128 | 2<br>(1.6)                                  | 12<br>(9.4)                                | 0.743          |
| Tobacco smoker<br>n=30                | 0                                           | 14<br>(5.5)                                | 0.375          |
